# Supplementary material for: Outcomes evaluating quality of life and their measurement properties in early-onset scoliosis: protocol for a systematic review
Source: HighWire-hosted journal article supplement (doi:10.1136/bmjopen-2021-048956), 2021-09-01
Supplement: bmjopen-2021-048956supp001_data_supplement.pdf [file bmjopen-2021-048956supp001_data_supplement.pdf]

## Supplementary File 1

### Search strategy - first stage

**UNFORMATTED TERMS - These terms are the relevant free text terms that require formatting/prefixing/suffixing appropriately for searching the relevant database.**

**Population of Interest –**

(Early onset scoliosis  
OR early-onset scoliosis  
OR infantile scoliosis  
OR congenital scoliosis  
OR juvenile scoliosis  
OR neuromuscular scoliosis  
OR syndromic scoliosis)

AND

**Construct of Interest –**

(Quality of Life  
OR quality of life  
OR life qualit\*  
OR living qualit\*  
OR quality of living  
OR Activities of Daily Living  
OR activities of daily living  
OR activity of daily living  
OR activities of daily life  
OR activity of daily life  
OR daily living activit\*  
OR daily life activit\*  
OR adl  
OR chronic limitation of activity  
OR self care\*  
OR Health Status  
OR health status  
OR level of health  
OR health level\*  
OR qol  
OR hrql  
OR hrqol  
OR activity of daily living  
OR activities of daily life  
OR activity of daily life  
OR daily life activit\*  
OR iadl  
OR living qualit\*  
OR quality of living

OR Activities of Daily Living  
OR adl  
OR activities of daily living\*  
OR daily living activit\*  
OR limitation of activit\*  
OR activity limitation  
OR independent living\*  
OR iadl\*  
OR everyday function\*  
OR functional abilit\*  
OR daily function\*  
OR physical function  
OR physical function\*  
OR participat\*  
OR participation restriction)

**Where a database supports searching for MeSH terms, the following terms can be added to separated by OR:**

“Life Quality”[MeSH Terms]

“Health-Related Quality Of Life” [MeSH Terms]

“Health Related Quality Of Life” [MeSH Terms]

“HRQOL” [MeSH Terms]

**Below are the pre-formatted search blocks for**

- 1) MEDLINE**
- 2) PubMed**
- 3) Embase**

**1) OVID MEDLINE**

("Early onset scoliosis"  
OR "early-onset scoliosis"  
OR "infantile scoliosis"  
OR "congenital scoliosis"  
OR "juvenile scoliosis"  
OR "neuromuscular scoliosis"  
OR "syndromic scoliosis")

AND

(Quality of Life  
OR "quality of life".ti,ab.  
OR "life qualit\*".ti,ab.  
OR "living qualit\*".ti,ab.  
OR "quality of living".ti,ab.  
OR "Activities of Daily Living".ti,ab  
OR "activities of daily living".ti,ab  
OR "activity of daily living".ti,ab  
OR "activities of daily life".ti,ab  
OR "activity of daily life".ti,ab  
OR "daily living activit\*".ti,ab  
OR "daily life activit\*".ti,ab  
OR adl.ti,ab  
OR "chronic limitation of activity".ti,ab  
OR "self care\*".ti,ab  
OR "Health Status".ti,ab  
OR "health status".ti,ab  
OR "level of health".ti,ab  
OR "health level\*".ti,ab  
OR qol.ti,ab  
OR hrql.ti,ab  
OR hrqol.ti,ab  
OR "activity of daily living".ti,ab  
OR "activities of daily life".ti,ab  
OR "activity of daily life".ti,ab  
OR "daily life activit\*".ti,ab  
OR "iadl".ti,ab  
OR "living qualit\*".ti,ab  
OR "quality of living".ti,ab

OR "Activities of Daily Living".ti,ab  
OR adl.ti,ab  
OR "activities of daily living\*".ti,ab  
OR "daily living activit\*".ti,ab  
OR "limitation of activit\*".ti,ab  
OR "activity limitation".ti,ab  
OR "independent living\*".ti,ab  
OR iadl.ti,ab

OR "everyday function\*".ti,ab  
OR "functional abilit\*".ti,ab  
OR "daily function\*".ti,ab  
OR "physical function".ti,ab  
OR "physical function\*".ti,ab  
OR "participat\*".ti,ab  
OR "participation restriction".ti,ab)

## **2) PubMed**

("Early onset scoliosis"  
OR "early-onset scoliosis"  
OR "infantile scoliosis"  
OR "congenital scoliosis"  
OR "juvenile scoliosis"  
OR "neuromuscular scoliosis"  
OR "syndromic scoliosis")

AND

("Quality of Life"[Mesh]  
OR "quality of life"[tiab]  
OR "life qualit\*"[tiab]  
OR "living qualit\*"[tiab]  
OR "quality of living"[tiab]  
OR "Activities of Daily Living"[tiab]  
OR "activities of daily living"[tiab]  
OR "activity of daily living"[tiab]  
OR "activities of daily life"[tiab]  
OR "activity of daily life"[tiab]  
OR "daily living activit\*"[tiab]  
OR "daily life activit\*"[tiab]  
OR adl[tiab]  
OR "chronic limitation of activity"[tiab]  
OR "self care\*"[tiab]  
OR "Health Status"[tiab]  
OR "health status"[tiab]  
OR "level of health"[tiab]

OR "health level\*" [tiab]  
OR qol [tiab]  
OR hrql [tiab]  
OR hrqol [tiab]  
OR "activity of daily living" [tiab]  
OR "activities of daily life" [tiab]  
OR "activity of daily life" [tiab]  
OR "daily life activit\*" [tiab]  
OR "iadl" [tiab]  
OR "living qualit\*" [tiab]  
OR "quality of living" [tiab]  
OR "Activities of Daily Living" [tiab]  
OR adl [tiab]  
OR "activities of daily living\*" [tiab]  
OR "daily living activit\*" [tiab]  
OR "limitation of activit\*" [tiab]  
OR "activity limitation" [tiab]  
OR "independent living\*" [tiab]  
OR iadl [tiab]

OR "everyday function\*" [tiab]  
OR "functional abilit\*" [tiab]  
OR "daily function\*" [tiab]  
OR "physical function" [tiab]  
OR "physical function\*" [tiab]  
OR "participat\*" [tiab]  
OR "participation restriction" [tiab]

### **3) Embase**

('Early onset scoliosis'  
OR 'early-onset scoliosis'  
OR 'infantile scoliosis'  
OR 'congenital scoliosis'  
OR 'juvenile scoliosis'  
OR 'neuromuscular scoliosis'  
OR 'syndromic scoliosis')

AND

'Quality of Life'  
OR 'quality of life':ab,ti  
OR 'life qualit\*':ab,ti  
OR 'living qualit\*':ab,ti  
OR 'quality of living':ab,ti  
OR 'Activities of Daily Living':ab,ti  
OR 'activities of daily living':ab,ti

OR 'activity of daily living':ab,ti  
OR 'activities of daily life':ab,ti  
OR 'activity of daily life':ab,ti  
OR 'daily living activit\*':ab,ti  
OR 'daily life activit\*':ab,ti  
OR adl:ab,ti  
OR 'chronic limitation of activity':ab,ti  
OR 'self care\*':ab,ti  
OR 'Health Status':ab,ti  
OR 'health status':ab,ti  
OR 'level of health':ab,ti  
OR 'health level\*':ab,ti  
OR qol:ab,ti  
OR hrql:ab,ti  
OR hrqol:ab,ti  
OR 'activity of daily living':ab,ti  
OR 'activities of daily life':ab,ti  
OR 'activity of daily life':ab,ti  
OR 'daily life activit\*':ab,ti  
OR 'iadl':ab,ti  
OR 'living qualit\*':ab,ti  
OR 'quality of living':ab,ti  
OR 'Activities of Daily Living':ab,ti  
OR adl:ab,ti  
OR 'activities of daily living\*':ab,ti  
OR 'daily living activit\*':ab,ti  
OR 'limitation of activit\*':ab,ti  
OR 'activity limitation':ab,ti  
OR 'independent living\*':ab,ti  
OR iadl:ab,ti  
OR 'everyday function\*':ab,ti  
OR 'functional abilit\*':ab,ti  
OR 'daily function\*':ab,ti  
OR 'physical function':ab,ti  
OR 'physical function\*':ab,ti  
OR 'participat\*':ab,ti  
OR 'participation restriction':ab,ti
